# Supplementary material
Source: PubMed Central journal article supplement (PMC5870830)
Supplement: NIHMS73330-supplement-Supplementary_table_I.pdf [file NIHMS73330-supplement-Supplementary_table_I.pdf]

**Supplementary Table 1 Quantitative RT-qPCR primer sequences**

| <b>Name</b>  | <b>Forward sequence</b> | <b>Reverse sequence</b> |
|--------------|-------------------------|-------------------------|
| Mouse IFIT1  | TCTAACACAGGGCCTTGCCAG   | GCAGAGCCCTTTTGGATAATGT  |
| Mouse IFIT3  | TGAACTGCTCAGCCACACA     | TCCCGGTTGACCTCACTC      |
| Mouse CXCL10 | ATGACGGGCCAGTGAGAATG    | ATTCCGGATTTCAGACATCTCT  |
| Mouse OAS1A  | GCTGCCAGCCTTTGATGT      | TGGCATAGATTCTGGGATCA    |
| Mouse ISG15  | GGAACGAAAGGGCCACAGCA    | CCTCCATGGGCCCTTCCCTCGA  |
| Mouse HPRT   | CTGGTGAAAAGGACCCTCTCG   | CAAGGGCATATCCAACAACA    |
