# Supplementary material
Source: PubMed Central journal article supplement (PMC5870830)

## Supplementary Figure - Gel source data

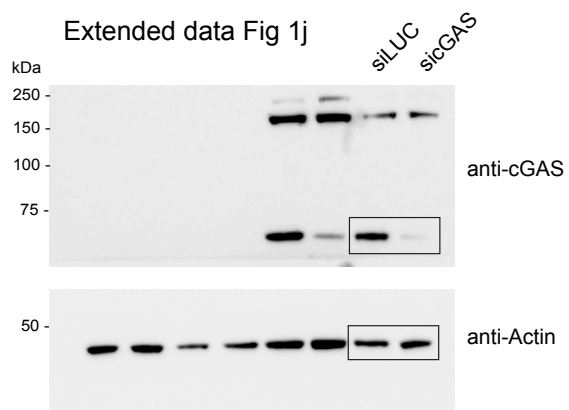

Supplement: NIHMS73330-supplement-Supplementary_Figure.pdf [file NIHMS73330-supplement-Supplementary_Figure.pdf]
